# Supplementary material for: High Prevalence of Undocumented SARS-CoV-2 Infections in the Pediatric Population of the Tyrolean District of Schwaz
Source: MDPI journal article supplement (doi:10.3390/v14102294), 2022-10-19
Supplement: s1 [file s1]

# Supplementary Materials “High Prevalence of Undocumented SARS-CoV-2 Infections in the Pediatric Population of the Tyrolean District of Schwaz”

## Supplementary File S1. Questionnaire (English translation)

### Questionnaire

Characterization of SARS-CoV-2 antibody response among individuals between the 2<sup>nd</sup> and 16<sup>th</sup> year of life in the district of Schwaz

**Have you been diagnosed with a SARS-CoV-2 infection?**

Yes                      No

If yes, when \_\_\_\_\_

If yes: how was the infection confirmed:                      by PCR                      by antibody testing

**Were you diagnosed with a variant of concern (VOC)?**

Yes                      Which one? \_\_\_\_\_

No                      Unknown

**Did you experience any symptoms?**

Yes                      No

If yes, which:    Cough                      Fever                      Difficulty breathing                      Sore throat                      Dysgeusia/

Loss of taste or smell    Abdominal pain/ Diarrhea                      Other: \_\_\_\_\_

**If yes, did your illness cause you to be bedridden for 3 or more days?**

Yes                      No

**Did you have to be admitted to hospital for a SARS-CoV-2 infection?**

Yes (to ICU)    Yes (non-ICU)                      No

**Has anyone living in the same household had a SARS-CoV-2 infection?**

Yes    Who? \_\_\_\_\_ When (Date)? \_\_\_\_\_ No

**Has anyone living in the same household been vaccinated?**    Yes    No    Don't know?

If yes: when? \_\_\_\_\_

With which vaccine?    AstraZeneca    BioNTec-Pfizer                      Moderna Biotech                      Don't know

**Would you get (your child) vaccinated if there was an approved vaccine?**

Yes                      No                      Don't know?

**Supplementary Materials “High Prevalence of Undocumented SARS-CoV-2 Infections in the Pediatric Population of the Tyrolean District of Schwaz”**

**Supplementary Table S1. Pediatric data by serostatus.**

| <b>Total seropositives (%)</b>         | <b>Seropositives<br/>n=132 (35.8)</b> | <b>Seronegatives<br/>n=237 (64.2)</b> |
|----------------------------------------|---------------------------------------|---------------------------------------|
| <b>Confirmed cases<sup>s</sup> (%)</b> | <b>53 (40.2)</b>                      | <b>2 (0.8)</b>                        |
| Anti-S positive                        | 53 (100)                              |                                       |
| Anti-N positive                        | 51 (96.2)                             |                                       |
| Neutralizing antibodies                | 45 (84.9)                             |                                       |
| <b>No history of infection</b>         | <b>79 (59.8)</b>                      | <b>235 (99.2)</b>                     |
| Anti-S positive                        | 78 (98.7)                             |                                       |
| Anti-N positive                        | 68 (86.1)                             |                                       |
| Neutralizing antibodies                | 67 (84.8)                             |                                       |
| <b>Symptoms (%)</b>                    | <b>58 (43.9)</b>                      | <b>44 (18.4)</b>                      |
| Fever                                  | 31 (23.5)                             | 23 (9.7)                              |
| Cough                                  | 26 (19.7)                             | 26 (11.0)                             |
| Disgeusia/Loss of taste or smell       | 17 (12.9)                             | 1 (0.4)                               |
| Sore throat                            | 16 (12.1)                             | 13 (5.5)                              |
| Abdominal pain/Diarrhea                | 5 (3.8)                               | 3 (1.3)                               |
| Difficulty breathing                   | 3 (2.3)                               | 3 (234)                               |
| Other                                  | 28 (21.2)*                            | 20 (8.4)**                            |
| Asymptomatic infection                 | 74 (56.1)                             | 193 (81.4)                            |
| Bedridden for ≥3 days                  | 9 (6.8)                               | 14 (5.9)                              |
| Hospital admission                     | 0 (0.0)                               | 1 (0.4)                               |
| History of household infections        | 91 (68.9)                             | 48 (20.3)                             |
| <b>Anti-S antibody status</b>          |                                       |                                       |
| Mean (SD)                              | 94.5 (74.7)                           |                                       |
| Geometric Mean (SD)                    | 0.0 (74.7)                            |                                       |
| Median (IQR)                           | 72.1 (42.1-131.3)                     |                                       |
| <b>Anti-N antibody status</b>          |                                       |                                       |
| Mean (SD)                              | 58.4 (63.6)                           |                                       |
| Geometric Mean (SD)                    | 21.9 (63.6)                           |                                       |
| Median (IQR)                           | 36.9 (12.8-76.6)                      |                                       |
| <b>Neutralizing antibody status</b>    |                                       |                                       |
| Mean (SD)                              | 65.4 (61.2)                           |                                       |
| Geometric Mean (SD)                    | 0.0 (61.2)                            |                                       |
| Median (IQR)                           | 47.0 (24.3-96.2)                      |                                       |

<sup>s</sup>Self reported PCR-confirmed

\*Fatigue(19); Headache(12); Joint/limb pain(6); Eye pain, Nausea/Vomiting, Runny nose(2); Vertigo(1)

\*\*Headache(10); Fatigue(6); “Flu-like”, Runny nose/rhinitis(4); Vomiting, Sweats, Laryngitis(1)

SD= standard deviation, IQR= interquartile range
